# Supplementary material for: AP‐1 is a regulatory transcription factor of inflammaging in the murine kidney and liver
Source: PubMed Central journal article supplement (PMC10352569; doi:10.1111/acel.13858), 2023-05-08
Supplement: ACEL-22-e13858-s001.pdf [file ACEL-22-e13858-s001.pdf]

**Supplementary Table 1**

| <b>Gene</b>    | <b>Forward Primer (5' to 3')</b> | <b>Reverse Primer (5' to 3')</b> |
|----------------|----------------------------------|----------------------------------|
| <i>Spi1</i>    | ATTGCGCTGTACCAGTTCCTGC           | TGGACGAGAACTGGAAGGTACC           |
| <i>Spib</i>    | CAAGCGCATGACGTATCAGAA            | GCTGTCAAACCTGGTAGGTGAG           |
| <i>Junb</i>    | CTGAAACCCACCTTGCGCG              | CCGAAAAGTAGCTGCCTGCC             |
| <i>Il7r</i>    | GCGGACGATCACTCCTTCTG             | AGCCCCACATATTTGAAATTCCA          |
| <i>Jchain</i>  | GAACTTTGTATACCATTTGTGACAGACG     | CTGGGTGGCAGTAACAACCT             |
| <i>H2-ob</i>   | AGGCGGACTGTTACTTCACC             | ATCCAGGCGTTTGTTCCTACTG           |
| <i>Cd37</i>    | GTCCTTTGTGGGTTTGTCTT             | GAGACAGCGCAGCTCCTTTAG            |
| <i>Tlr2</i>    | TCTGGGCAGTCTTGAACATTT            | AGAGTCAGGTGATGGATGTCG            |
| <i>Cxcr4</i>   | AGGAAACTGCTGGCTGAAAAGG           | GGAATTGAAACACCACCATCCA           |
| <i>Ccl5</i>    | TGCCACGTCAAGGAGTATTTT            | AACCCACTTCTTCTCTGGGTTG           |
| <i>Cdkn2a</i>  | GCCCAACGCCCCGAACTCTTTC           | GCGACGTTCCAGCGGTACACA            |
| <i>Batf</i>    | CCAGAAGAGCCGACAGAGAC             | GAGCTGCGTTCTGTTTCTCC             |
| <i>Ces1d</i>   | GGAGAGTCAGCAGGAGGTTTC            | GAGGGACACCCACTCTCAG              |
| <i>Abcd3</i>   | GGCCTGCACGGTAAGAAAAGT            | CCGCAATAAGTAACAAGTAGCCT          |
| <i>Acsm2</i>   | ACTAATACCCATACAGTGGGGC           | CTGAAGATCTCTTGCCAGCCTTC          |
| <i>Ehhadh</i>  | TGGCTCTAACCGTATGGTCC             | CTATGATCCGCCTCTGCAA              |
| <i>Me1</i>     | AGTATCCATGACAAAGGGCAC            | ATCCATTACAGCCAAGGTC              |
| <i>Acot12</i>  | CCACCACCTTGGAGAAGATAAA           | GTGAGGTCAGACAAGAGATGATAAG        |
| <i>Ugt2b38</i> | TGCGCCACAAAAGGGCTAA              | ACACAAGAGAGTAGGAAGCCG            |
| <i>Fmo2</i>    | ACTCAGAGCAACGGAAAGGA             | CCTGGGAATGACTTGAGTGG             |
| <i>Nr1h4</i>   | GCAGGGAGAAAACGGAAC               | TCTGTACATGACTGGTTGCC             |
| <i>Acsm5</i>   | CAGGTTCCAATAACCACCT              | CCGTCAAACAGTGCCTCAG              |
| <i>Crot</i>    | GAACGGACATTTCAGTACCAGG           | CTTCATTTGCGAATGGTTTCACT          |
| <i>Coq10b</i>  | GAGGACTATCAGCATTTTCGTTCC         | AGTGCGGTTTTACCAAGGTTAC           |
| <i>c-Jun</i>   | GCCTACGGCTACAGTAACCC             | GAGAAGGTCCGAGTTCTTGG             |
| <i>c-fos</i>   | GGGGACAGCCTTTCCTA                | CTGTCACCGTGGGGATAAAG             |
| <i>Jund</i>    | GAAACGCCCTTCTATGGCGA             | CAGCGCGTCTTTCTTCAGC              |
| <i>Il-6</i>    | GTTCTCTGGGAAATCGTGGA             | GGTACTCCAGAAGACCAGAGGA           |
| <i>Gapdh</i>   | CTTTGTCAAGCTCATTTCTCTGG          | TCTTGCTCAGTGTCTTGC               |
